# Supplementary material for: Effects of computer-assisted oral anticoagulant therapy
Source: PubMed Central journal article supplement (PMC3502261; doi:10.1186/1477-9560-10-17), 2012-08-30
Supplement: 1477-9560-10-17-S1.pdf [file 1477-9560-10-17-S1.pdf]

1. **Tablets/day, day 1-4:**

2. **INR, day 5:**

|      |           |           |           |      |
|------|-----------|-----------|-----------|------|
| <1,8 | 1,8 - 2,4 | 2,5 - 3,0 | 3,1 - 3,5 | >3,5 |
|------|-----------|-----------|-----------|------|

3. **Tablets/day, days 5-7:**

|   |     |   |     |   |
|---|-----|---|-----|---|
| 2 | 1,5 | 1 | 0,5 | 0 |
|---|-----|---|-----|---|

4. **INR, day 8:**

|                                                                             |    |    |    |   |   |
|-----------------------------------------------------------------------------|----|----|----|---|---|
| The table below shows the estimated maintenance dosages as tablets per week |    |    |    |   |   |
| <1,8                                                                        | 16 | 13 | 10 | 6 | 4 |
| 1,8 - 2,4                                                                   | 14 | 11 | 8  | 5 | 3 |
| 2,5 - 3,0                                                                   | 12 | 9  | 7  | 4 | 2 |
| 3,1 - 3,5                                                                   | 10 | 7  | 5  | 3 | 1 |
| >3,5                                                                        | 8  | 6  | 4  | 2 | 0 |

The tablets should be as evenly distributed as possible throughout the week

5. **Next INR:**  Day 12       Day 15

6. **Dose adjustments:** Use Table 2 for adjusting maintenance dosage
